# Supplementary material for: Emissions of volatile organic compounds (VOCs) from concentrated animal feeding operations (CAFOs): chemical compositions and separation of sources
Source: Copernicus journal article supplement (doi:10.5194/acp-17-4945-2017), 2017-04-18
Supplement: Supplementary file 1 [file acp-17-4945-2017-supplement.pdf]

Supplement of Atmos. Chem. Phys., 17, 4945–4956, 2017  
<http://www.atmos-chem-phys.net/17/4945/2017/>  
doi:10.5194/acp-17-4945-2017-supplement  
© Author(s) 2017. CC Attribution 3.0 License.

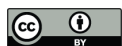

*Supplement of*

**Emissions of volatile organic compounds (VOCs) from concentrated animal feeding operations (CAFOs): chemical compositions and separation of sources**

**Bin Yuan et al.**

*Correspondence to:* Bin Yuan (bin.yuan@psi.ch, yuanbin501@gmail.com)

The copyright of individual parts of the supplement might differ from the CC-BY 3.0 licence.

15 **1. CAFO facilities and environmental conditions during measurements**

16 Table S1. Animal types and maximum permitted livestock for investigated sites

| Site type         | Maximum permitted livestock capacity, head | Wind speed during measurements, m/s | Van speed downwind the facility, m/s |
|-------------------|--------------------------------------------|-------------------------------------|--------------------------------------|
| Dairy farm #1     | 6,100                                      | 5.0±1.2                             | 4.7±0.7                              |
| Dairy farm #2     | 7,500                                      | 4.7±1.6                             | 17±2.3                               |
| Beef feed yard #1 | 54,000                                     | 4.8±1.3                             | 6.7±1.8                              |
| Beef feed yard #2 | 98,000                                     | 5.5±1.3                             | 24±0.8                               |
| Sheep feed yard   | 95,000                                     | 5.5±1.3                             | 4.3±0.5                              |
| Chicken house     | >110,000                                   | 7.5±1.2                             | 5.5±0.7                              |

17

18 Table S2. Meteorological conditions during mobile measurements

| Parameters             | Average±standard deviation |
|------------------------|----------------------------|
| Temperature, °C        | 10.7±0.6                   |
| Relative humidity, %   | 23.6±1.7                   |
| Wind speed, m/s        | 5.6±1.8                    |
| Wind direction, degree | 120±14                     |

19

20 **2. Combustion sources**

21 Mobile measurements of CAFOs in this study were mainly performed in rural regions with  
 22 little traffic. The CAFO facilities were usually in the right-hand side of the driver for most of the  
 23 measurements, which ensures that on-road vehicle traffic (if any) would not come between the  
 24 mobile laboratory and CAFO facilities. Thus, we do not expect contributions of on-road vehicle  
 25 emissions to our measurements shown in Figure 1-2 and Figure S2-S3.

26 However, carbon monoxide (CO), a tracer of combustion emissions, were significantly  
 27 higher than background (~100 ppb) in several plumes sampled downwind of CAFOs (Figure S1).  
 28 CO concentrations were up to 600 ppb in a plume downwind of the beef feed yard #1 (Figure  
 29 S1A). This CO plume was from the feed mill area, implying that the plume might be as the result  
 30 of operation of equipment used in the feed mill. The highest CO concentrations downwind of the  
 31 CAFOs in this study were observed downwind of the sheep feed yard (up to 5 ppm, Figure S1B).  
 32 This CO plume from the sheep feed yard was close to a narrow spike of ethanol as well. Ethanol  
 33 was possibly due to emissions from a silage pile. In these CO plumes, we observed some  
 34 enhancements of carbon dioxide (CO<sub>2</sub>), whereas the enhancements of various VOCs were small  
 35 (if any), compared to the enhancements as the results of emissions from other sources. Thus, we  
 36 conclude that combustion sources were negligible for VOC emissions shown in this study.

37

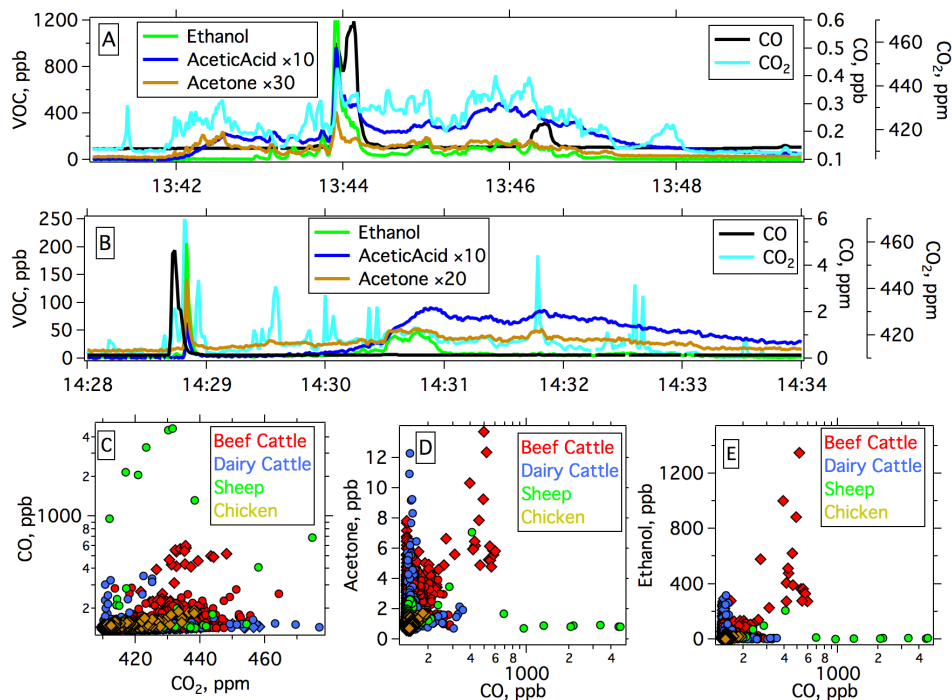

38  
 39 Figure S1. (A and B) Time series of CO, CO<sub>2</sub>, ethanol, acetic acid and acetone downwind of the  
 40 beef feed yard #1 (A) and the sheep feed yard (B). (C, D and E) Scatterplots of CO<sub>2</sub>, acetone and  
 41 ethanol versus CO from different CAFOs.

### 42 3. VOC distributions for dairy farm #2

43 Figure S2 shows measurements downwind of the other dairy farm (dairy #2). In addition  
 44 to NH<sub>3</sub> emissions from animal+waste and ethanol emissions from the feed mill, high  
 45 concentrations of ethanol were observed downwind of three milking parlors. CH<sub>4</sub>, acetone and  
 46 dimethyl sulfide (DMS) were also enhanced in these plumes, whereas acetic acid was only  
 47 moderately elevated and NH<sub>3</sub> was not enhanced. Emission compositions from the milking parlors  
 48 are clearly different from feed storage/handling.

49 Figure S3 shows measurements downwind of a chicken house. NH<sub>3</sub> concentrations  
 50 measured downwind the chicken house were the lowest among the six CAFOs. An ethanol  
 51 plume was observed downwind of the feed mill, similar to other CAFOs. CH<sub>4</sub> concentrations  
 52 were not elevated, as chickens are not emitters for CH<sub>4</sub>. The increase of acetone and acetic acid  
 53 was clear in the feed mill plume, but the enhancements of the two VOCs were low when NH<sub>3</sub>  
 54 concentrations were high.

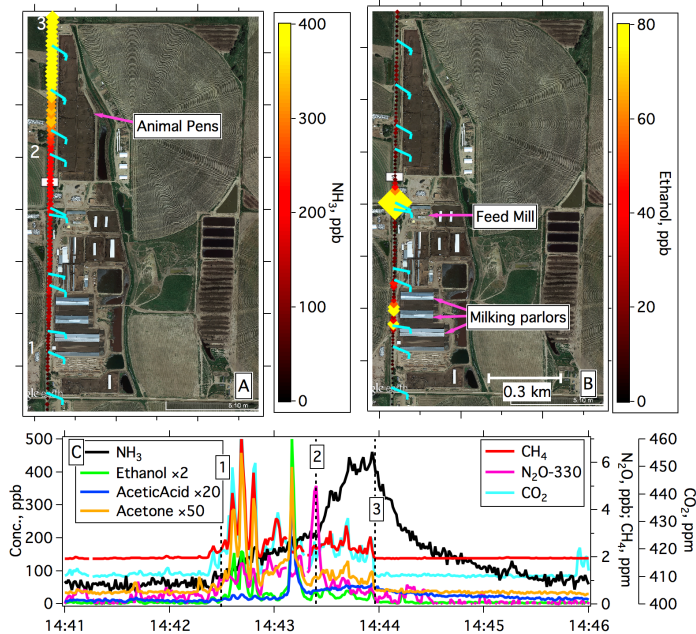

55  
 56 Figure S2. (A and B) Drive track of mobile laboratory color- and size-coded by  $\text{NH}_3$  (A) and  
 57 ethanol (B) concentrations downwind of a dairy farm (dairy #2). The prevailing wind is shown  
 58 by wind barbs (light blue flags) in the map. (C) Time series of  $\text{NH}_3$ ,  $\text{CH}_4$ ,  $\text{CO}_2$ ,  $\text{N}_2\text{O}$ , ethanol,  
 59 acetic acid and acetone measured downwind of the dairy farm. Numbers (1-3) in (A) and (C) are  
 60 used to allow alignment of the mobile laboratory locations on the map with the corresponding  
 61 time series in panel C.

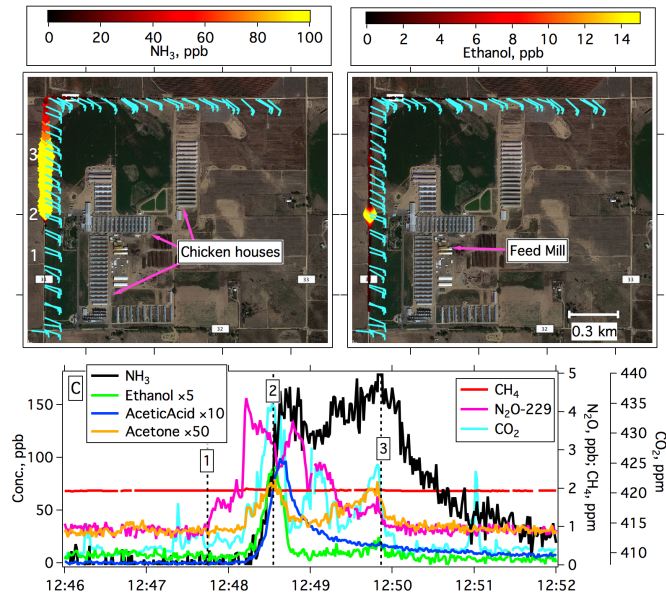

62  
 63 Figure S3. (A and B) Drive track of mobile laboratory color- and size-coded by  $\text{NH}_3$  (A) and  
 64 ethanol (B) concentrations downwind of a chicken house. The prevailing wind is shown by wind  
 65 barbs (light blue flags) in the map. (C) Time series of  $\text{NH}_3$ ,  $\text{CH}_4$ ,  $\text{CO}_2$ ,  $\text{N}_2\text{O}$ , ethanol, acetic acid  
 66 and acetone measured downwind of the chicken house. Numbers (1-3) in (A) and (C) are used to

67 allow alignment of the mobile laboratory locations on the map with the corresponding time series  
 68 in panel C.

69 **4. Calculation of ethanol from feed storage/handling and milking parlors**

70 As shown in the main text, ethanol can be used as a tracer for emissions from feed  
 71 storage+handling, but there is some ethanol attributable to animal+waste emissions that needs to  
 72 be taken into account. Scatterplots of ethanol versus  $NH_3$  from these CAFOs are shown in Figure  
 73 S4A. The correlation between ethanol and  $NH_3$  was low ( $R=0.24$ ), indicating different sources  
 74 for the two species. The data points that were clearly influenced by emissions of feed  
 75 storage+handling and milking parlors are removed from the scatterplots and data points that are  
 76 only influenced by animal+waste are shown in Figure S4B. The correlation coefficient between  
 77 ethanol and  $NH_3$  increases to 0.79. The emission ratio of ethanol to  $NH_3$  ( $ER_{C_2H_5OH/NH_3}$ ) can be  
 78 estimated from the slope of the scatterplot in Figure S4B ( $0.017 \pm 0.001$  ppb/ppb).

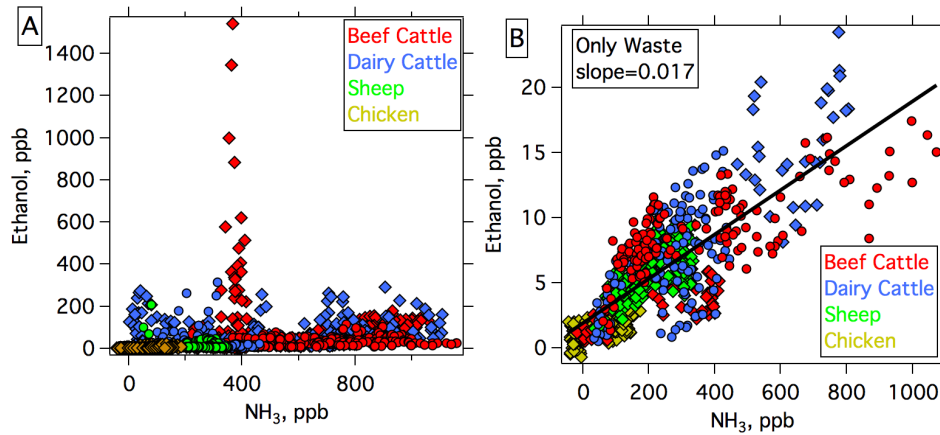

79  
 80 Figure S4. Scatterplots of ethanol versus  $NH_3$  from mobile laboratory measurements: (A) all  
 81 data; (B) only data when animal+waste emissions are large. The data points with clear influence  
 82 from feed storage+handling and milking parlors are removed from (B), based on the spatial data  
 83 shown in Figure 1-2 and Figure S2-S3.

84 Ethanol concentrations from feed emissions ( $[C_2H_5OH]_{Feed}$ ) are calculated by subtracting  
 85 the contribution of ethanol from animal+waste ( $ER_{C_2H_5OH/NH_3} \times [NH_3]$ ) from measured ethanol  
 86 concentrations ( $[C_2H_5OH]$ ).

87 
$$[C_2H_5OH]_{Feed} = [C_2H_5OH] - ER_{C_2H_5OH/NH_3} \times [NH_3] \quad Eq. (S1)$$

88 As shown in section 3.1 and (section 1 in SI), ethanol was elevated downwind of the  
 89 milking parlors in one of the two dairy farm (dairy #2). For this dairy farm, ethanol  
 90 concentrations that are not from animal+waste can be calculated as:

91 
$$[C_2H_5OH]_{non-waste} = [C_2H_5OH] - ER_{C_2H_5OH/NH_3} \times [NH_3] \quad Eq. (S2)$$

92 We can further separate ethanol concentrations related to milking parlors and feed  
 93 storage/handling for this facility. We assume that all of the enhancements of  $[C_2H_5OH]_{non-waste}$   
 94 except those downwind of the milking parlors were due to feed storage+handling emissions (see  
 95 Figure S1).

96 Using this information, a third term can be added in the multivariate linear fits for dairy  
 97 farm #2 to obtain the relative fractions from emissions of milking parlors as well:

$$98 \quad [VOC] = ER_{C_2H_5OH} \times [C_2H_5OH]_{Feed} + ER_{NH_3} \times [NH_3] + ER_{C_2H_5OH'} \times [C_2H_5OH]_{Milk}$$

$$99 \quad + [bg] \quad \quad \quad Eq. (S3)$$

100  
 101 **5. Contribution of different sources to total VOC concentrations, odor activity values,**  
 102 **OH reactivity and NO<sub>3</sub> reactivity**

103 In addition to total VOC concentrations, we also calculated the fractional contribution of  
 104 different sources to odor activity value, OH reactivity and NO<sub>3</sub> reactivity (Figure S5).

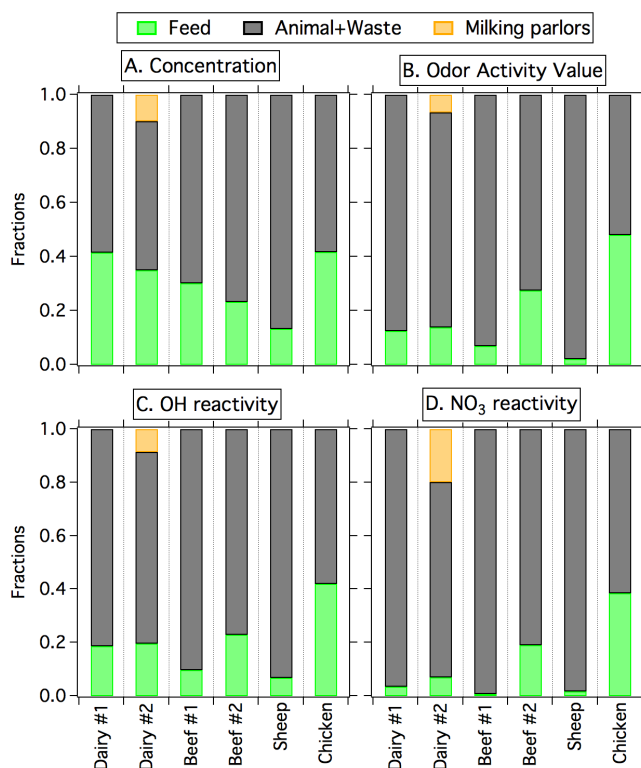

105  
 106 Figure S5. The relative contributions of emissions from feed storage+handling, animal+waste  
 107 and milking parlors (only for dairy farm #2) to total VOC concentrations (A), odor activity  
 108 values (B), OH reactivity (C) and NO<sub>3</sub> reactivity (D) for the investigated CAFOs.

109 **6. Flight track of NOAA WP-3D on April 13, 2015**

110

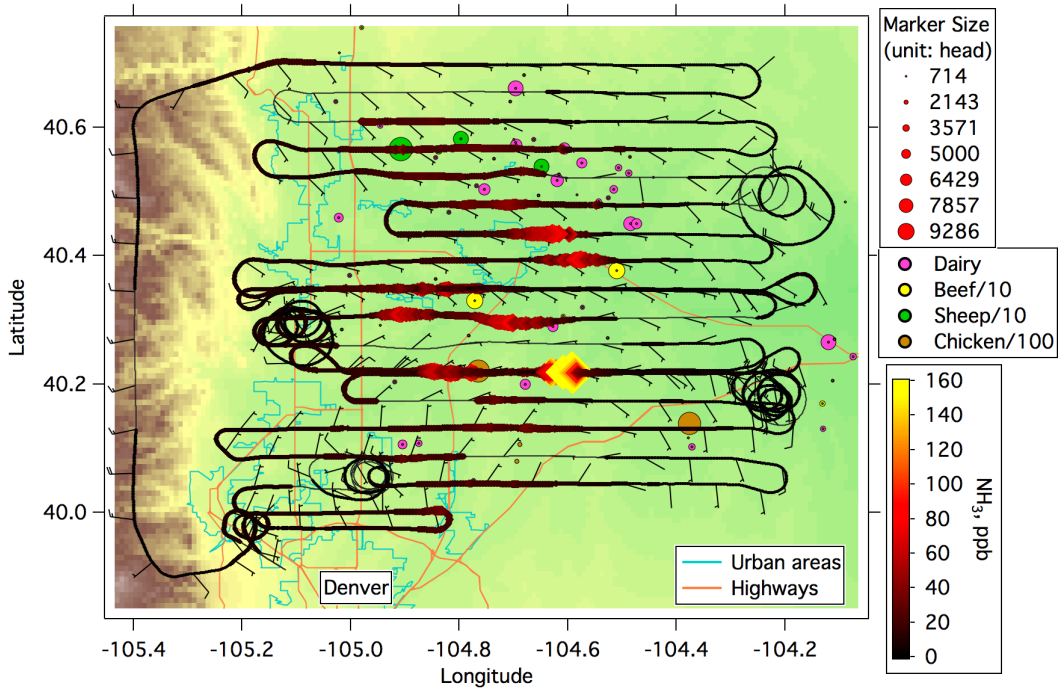

111

112 Figure S6. Flight track of NOAA WP-3D on April 13, 2015 during the SONGNEX campaign.  
 113 The flight track is color- and size-coded using  $\text{NH}_3$  concentrations. Wind directions at flight  
 114 levels are also shown. The locations of CAFOs sites in northeastern Colorado are also shown in  
 115 the graph.

116

## 117 7. Emission ratios and relative fractions from different sources

118 The obtained emission ratios and relative fractions from different sources for the  
 119 investigated CAFO facilities in this study are tabulated in Table S3-S8.

120 Table S3. Emissions ratios (ER) from site-integration analysis and multivariate analysis, along  
 121 with the relative fractions from feed storage+handling to different VOC species for dairy farm  
 122 #1.

| VOCs                            | Site-integrated ER<br>to NH <sub>3</sub> , ppt/ppb | ER from multivariate analysis                         |                                      | Percentage<br>fractions from<br>feed, % |
|---------------------------------|----------------------------------------------------|-------------------------------------------------------|--------------------------------------|-----------------------------------------|
|                                 |                                                    | Animal+waste relative<br>to NH <sub>3</sub> , ppt/ppb | Feed relative to<br>ethanol, ppt/ppb |                                         |
| Acetic Acid                     | 5.11                                               | 0.00±0.32                                             | 25.33±1.60                           | 100                                     |
| Propionic<br>Acid               | 0.84                                               | 0.00±0.11                                             | 6.71±0.55                            | 100                                     |
| Butyric Acid                    | 0.28                                               | 0.00±0.02                                             | 2.18±0.11                            | 100                                     |
| C5 Acid                         | 0.04                                               | 0.00±0.00                                             | 0.16±0.01                            | 100                                     |
| C6 Acid                         | 0.02                                               | 0.00±0.00                                             | 0.05±0.01                            | 100                                     |
| C7 Acid                         | 0.00                                               | 0.00±0.00                                             | 0.01±0.00                            | 85.3                                    |
| Ethanol                         | 127.92                                             | 17.05±0.49                                            | 1000±0.00                            | 93.2                                    |
| Methanol                        | 50.48                                              | 4.04±2.32                                             | 308±11                               | 89.3                                    |
| CH <sub>3</sub> CHO             | 2.69                                               | 0.69±0.08                                             | 16.16±0.37                           | 72.0                                    |
| Acetone                         | 1.86                                               | 0.69±0.09                                             | 5.43±0.42                            | 46.1                                    |
| MEK                             | 0.42                                               | 0.16±0.02                                             | 1.32±0.10                            | 48.3                                    |
| Acrolein                        | 0.26                                               | 0.04±0.01                                             | 1.45±0.07                            | 80.8                                    |
| MVK+MACR                        | 0.10                                               | 0.05±0.01                                             | 0.21±0.03                            | 32.4                                    |
| C4H6O2                          | 0.16                                               | 0.10±0.01                                             | 0.14±0.04                            | 12.8                                    |
| Phenol                          | 0.56                                               | 0.57±0.02                                             | 0.25±0.09                            | 4.6                                     |
| Cresol                          | 0.34                                               | 0.31±0.01                                             | 0.00±0.05                            | 0.0                                     |
| H <sub>2</sub> S                | 12.64                                              | 1.58±1.27                                             | 0.00±6.22                            | 0.0                                     |
| CH <sub>4</sub> S               | 0.17                                               | 0.09±0.01                                             | 0.10±0.05                            | 10.9                                    |
| C <sub>2</sub> H <sub>6</sub> S | 0.50                                               | 0.26±0.03                                             | 0.86±0.14                            | 26.3                                    |
| C <sub>3</sub> H <sub>8</sub> S | 0.00                                               | 0.00±0.00                                             | 0.01±0.01                            | 57.4                                    |
| DMDS                            | 0.01                                               | 0.00±0.00                                             | 0.01±0.01                            | 25.3                                    |
| DMA                             | 0.01                                               | 0.01±0.00                                             | 0.00±0.01                            | 0.0                                     |
| TMA                             | 0.18                                               | 0.19±0.01                                             | 0.03±0.03                            | 2.0                                     |
| Formamide                       | 0.23                                               | 0.17±0.01                                             | 0.00±0.04                            | 0.0                                     |
| Acetamide                       | 0.06                                               | 0.04±0.00                                             | 0.03±0.02                            | 9.3                                     |
| Propanamide                     | 0.01                                               | 0.01±0.00                                             | 0.00±0.01                            | 0.0                                     |
| Indole                          | 0.00                                               | 0.00±0.00                                             | 0.00±0.00                            | 5.8                                     |

123



124 Table S4. Emissions ratios (ER) from site-integration analysis and multivariate analysis, along  
 125 with the relative fractions from feed storage+handling and milking parlors to different VOC  
 126 species for dairy farm #2.

| VOCs                                         | Site-integrated ER to NH <sub>3</sub> , ppt/ppb | ER from multivariate analysis                      |                                   |                                              | Percentage fractions from feed, % | Percentage fractions from milking parlors, % |
|----------------------------------------------|-------------------------------------------------|----------------------------------------------------|-----------------------------------|----------------------------------------------|-----------------------------------|----------------------------------------------|
|                                              |                                                 | Animal+waste relative to NH <sub>3</sub> , ppt/ppb | Feed relative to ethanol, ppt/ppb | Milking parlors relative to ethanol, ppt/ppb |                                   |                                              |
| Acetic Acid                                  | 10.11                                           | 6.06±0.32                                          | 70.39±0.96                        | 13.19±2.40                                   | 37.4                              | 2.4                                          |
| Propionic Acid                               | 0.89                                            | 0.23±0.05                                          | 8.27±0.16                         | 1.79±0.39                                    | 62.6                              | 4.7                                          |
| Butyric Acid                                 | 0.38                                            | 0.09±0.02                                          | 6.63±0.08                         | 0.89±0.19                                    | 76.8                              | 3.6                                          |
| C5 Acid                                      | 0.03                                            | 0.01±0.01                                          | 0.37±0.02                         | 0.07±0.04                                    | 59.4                              | 4.0                                          |
| C6 Acid                                      | 0.02                                            | 0.00±0.00                                          | 0.12±0.01                         | 0.02±0.02                                    | 68.9                              | 4.0                                          |
| C7 Acid                                      | 0.01                                            | 0.00±0.00                                          | 0.01±0.01                         | 0.01±0.02                                    | 66.5                              | 33.5                                         |
| Ethanol                                      | 101.09                                          | 17.05±0.49                                         | 1000±0.00                         | 1000±0.00                                    | 64.8                              | 22.6                                         |
| Methanol                                     | 49.59                                           | 12.5±3.8                                           | 96.8±11.6                         | 203±29                                       | 24.2                              | 17.7                                         |
| CH <sub>3</sub> CHO                          | 2.60                                            | 0.20±0.15                                          | 10.40±0.45                        | 18.52±1.11                                   | 50.3                              | 31.2                                         |
| Acetone                                      | 6.89                                            | 1.03±0.32                                          | 33.20±0.99                        | 82.34±2.47                                   | 40.9                              | 35.3                                         |
| MEK                                          | 0.57                                            | 0.13±0.03                                          | 2.46±0.09                         | 2.32±0.23                                    | 42.7                              | 14                                           |
| Acrolein                                     | 0.27                                            | 0.02±0.03                                          | 2.67±0.09                         | 2.68±0.23                                    | 66.4                              | 23.3                                         |
| MVK+MACR                                     | 0.14                                            | 0.00±0.03                                          | 0.08±0.08                         | 0.00±0.20                                    | 100                               | 0.0                                          |
| C <sub>4</sub> H <sub>6</sub> O <sub>2</sub> | 0.16                                            | 0.03±0.02                                          | 0.15±0.05                         | 0.00±0.13                                    | 20.4                              | 0.0                                          |
| Phenol                                       | 0.38                                            | 0.26±0.02                                          | 0.07±0.06                         | 0.00±0.14                                    | 1.4                               | 0.0                                          |
| Cresol                                       | 0.35                                            | 0.28±0.01                                          | 0.00±0.04                         | 0.08±0.09                                    | 0.0                               | 0.5                                          |
| H <sub>2</sub> S                             | 6.97                                            | 1.99±1.06                                          | 4.58±3.22                         | 14.60±8.06                                   | 9.8                               | 10.9                                         |
| CH <sub>4</sub> S                            | 0.20                                            | 0.06±0.02                                          | 0.17±0.05                         | 0.61±0.12                                    | 11.1                              | 13.6                                         |
| C <sub>2</sub> H <sub>6</sub> S              | 0.80                                            | 0.20±0.06                                          | 6.17±0.18                         | 4.43±0.44                                    | 54.3                              | 13.6                                         |
| C <sub>3</sub> H <sub>8</sub> S              | 0.01                                            | 0.00±0.00                                          | 0.00±0.01                         | 0.03±0.02                                    | 2.6                               | 23.6                                         |
| DMDS                                         | 0.02                                            | 0.00±0.00                                          | 0.02±0.01                         | 0.00±0.03                                    | 16.3                              | 0.0                                          |
| DMA                                          | 0.02                                            | 0.03±0.01                                          | 0.02±0.02                         | 0.00±0.04                                    | 2.8                               | 0.0                                          |
| TMA                                          | 0.14                                            | 0.08±0.01                                          | 0.03±0.03                         | 0.00±0.07                                    | 1.6                               | 0.0                                          |
| Formamide                                    | 0.35                                            | 0.24±0.02                                          | 0.00±0.06                         | 0.04±0.14                                    | 0.0                               | 0.3                                          |
| Acetamide                                    | 0.06                                            | 0.04±0.01                                          | 0.00±0.03                         | 0.27±0.07                                    | 0.0                               | 12                                           |
| Propanamide                                  | 0.02                                            | 0.01±0.00                                          | 0.00±0.01                         | 0.00±0.03                                    | 2.1                               | 0.0                                          |
| Indole                                       | 0.00                                            | 0.00±0.00                                          | 0.00±0.00                         | 0.01±0.01                                    | 29.3                              | 29.9                                         |

127 Table S5. Emissions ratios (ER) from site-integration analysis and multivariate analysis, along  
 128 with the relative fractions from feed storage+handling to different VOC species for beef feed  
 129 yard #1.

| VOCs                            | Site-integrated ER<br>to NH <sub>3</sub> , ppt/ppb | ER from multivariate analysis                         |                                      | Percentage<br>fractions from<br>feed, % |
|---------------------------------|----------------------------------------------------|-------------------------------------------------------|--------------------------------------|-----------------------------------------|
|                                 |                                                    | Animal+waste relative<br>to NH <sub>3</sub> , ppt/ppb | Feed relative to<br>ethanol, ppt/ppb |                                         |
| Acetic Acid                     | 47.47                                              | 31.29±0.91                                            | 60.09±1.63                           | 21.0                                    |
| Propionic<br>Acid               | 6.76                                               | 6.70±0.14                                             | 6.25±0.25                            | 11.4                                    |
| Butyric Acid                    | 1.69                                               | 0.64±0.03                                             | 5.09±0.06                            | 52.3                                    |
| C5 Acid                         | 0.27                                               | 0.13±0.01                                             | 0.62±0.02                            | 39.1                                    |
| C6 Acid                         | 0.03                                               | 0.00±0.00                                             | 0.12±0.00                            | 90.8                                    |
| C7 Acid                         | 0.01                                               | 0.00±0.00                                             | 0.03±0.00                            | 68.6                                    |
| Ethanol                         | 161.45                                             | 17.05±0.49                                            | 1000±0.00                            | 100                                     |
| Methanol                        | 17.80                                              | 8.82±0.49                                             | 35.8±0.87                            | 35.9                                    |
| CH <sub>3</sub> CHO             | 3.90                                               | 0.54±0.10                                             | 17.49±0.18                           | 81.7                                    |
| Acetone                         | 5.51                                               | 1.44±0.23                                             | 7.09±0.41                            | 40.5                                    |
| MEK                             | 1.26                                               | 0.65±0.04                                             | 1.27±0.07                            | 21.4                                    |
| Acrolein                        | 0.64                                               | 0.31±0.01                                             | 2.16±0.03                            | 48.9                                    |
| MVK+MACR                        | 0.21                                               | 0.18±0.01                                             | 0.10±0.01                            | 7.0                                     |
| C4H6O2                          | 0.42                                               | 0.38±0.01                                             | 0.08±0.02                            | 3.0                                     |
| Phenol                          | 0.94                                               | 0.86±0.02                                             | 0.11±0.04                            | 1.7                                     |
| Cresol                          | 1.34                                               | 1.47±0.03                                             | 0.00±0.05                            | 0.0                                     |
| H <sub>2</sub> S                | 6.55                                               | 2.59±0.49                                             | 0.00±0.87                            | 0.0                                     |
| CH <sub>4</sub> S               | 0.68                                               | 0.71±0.03                                             | 0.10±0.06                            | 2.0                                     |
| C <sub>2</sub> H <sub>6</sub> S | 0.33                                               | 0.17±0.02                                             | 0.47±0.03                            | 27.7                                    |
| C <sub>3</sub> H <sub>8</sub> S | 0.01                                               | 0.00±0.00                                             | 0.00±0.00                            | 4.6                                     |
| DMDS                            | 0.04                                               | 0.04±0.01                                             | 0.00±0.01                            | 0.0                                     |
| DMA                             | 0.01                                               | 0.01±0.00                                             | 0.00±0.00                            | 0.0                                     |
| TMA                             | 0.08                                               | 0.10±0.00                                             | 0.00±0.01                            | 0.0                                     |
| Formamide                       | 0.24                                               | 0.17±0.01                                             | 0.03±0.01                            | 2.6                                     |
| Acetamide                       | 0.08                                               | 0.05±0.00                                             | 0.03±0.01                            | 7.3                                     |
| Propanamide                     | 0.02                                               | 0.01±0.00                                             | 0.01±0.00                            | 8.0                                     |
| Indole                          | 0.01                                               | 0.01±0.00                                             | 0.00±0.00                            | 0.0                                     |

130

131

132 Table S6. Emissions ratios (ER) from site-integration analysis and multivariate analysis, along  
 133 with the relative fractions from feed storage+handling to different VOC species for beef feed  
 134 yard #2.

| VOCs                            | Site-integrated<br>ER to NH <sub>3</sub> ,<br>ppt/ppb | ER from multivariate analysis                            |                                      | Percentage<br>fractions from<br>feed, % |
|---------------------------------|-------------------------------------------------------|----------------------------------------------------------|--------------------------------------|-----------------------------------------|
|                                 |                                                       | Animal+waste<br>relative to NH <sub>3</sub> ,<br>ppt/ppb | Feed relative to<br>ethanol, ppt/ppb |                                         |
| Acetic Acid                     | 32.48                                                 | 22.86±0.89                                               | 160.08±14.57                         | 18.5                                    |
| Propionic<br>Acid               | 4.74                                                  | 3.49±0.16                                                | 14.44±2.59                           | 11.9                                    |
| Butyric Acid                    | 1.11                                                  | 0.78±0.04                                                | 5.07±0.58                            | 17.4                                    |
| C5 Acid                         | 0.20                                                  | 0.13±0.01                                                | 0.93±0.10                            | 18.5                                    |
| C6 Acid                         | 0.01                                                  | 0.01±0.00                                                | 0.06±0.01                            | 26.3                                    |
| C7 Acid                         | 0.00                                                  | 0.00±0.00                                                | 0.00±0.01                            | 6.5                                     |
| Ethanol                         | 54.91                                                 | 17.05±0.49                                               | 1000±0.00                            | 75.2                                    |
| Methanol                        | 13.53                                                 | 5.07±0.39                                                | 132±6.0                              | 45.8                                    |
| CH <sub>3</sub> CHO             | 2.21                                                  | 0.92±0.05                                                | 27.14±0.88                           | 48.9                                    |
| Acetone                         | 3.87                                                  | 1.67±0.14                                                | 37.52±2.21                           | 42.2                                    |
| MEK                             | 1.25                                                  | 0.46±0.05                                                | 12.38±0.82                           | 46.6                                    |
| Acrolein                        | 0.28                                                  | 0.17±0.01                                                | 2.89±0.13                            | 36.0                                    |
| MVK+MACR                        | 0.29                                                  | 0.16±0.01                                                | 0.93±0.15                            | 15.6                                    |
| C4H6O2                          | 0.50                                                  | 0.28±0.02                                                | 0.34±0.26                            | 3.8                                     |
| Phenol                          | 1.34                                                  | 0.84±0.04                                                | 7.33±0.61                            | 22.1                                    |
| Cresol                          | 0.86                                                  | 0.60±0.03                                                | 4.43±0.42                            | 19.4                                    |
| H <sub>2</sub> S                | 4.60                                                  | 1.09±0.32                                                | 0.00±5.24                            | 0.0                                     |
| CH <sub>4</sub> S               | 0.66                                                  | 0.16±0.03                                                | 3.06±0.47                            | 38.2                                    |
| C <sub>2</sub> H <sub>6</sub> S | 0.44                                                  | 0.25±0.02                                                | 1.32±0.33                            | 14.4                                    |
| C <sub>3</sub> H <sub>8</sub> S | 0.01                                                  | 0.00±0.00                                                | 0.03±0.02                            | 44.5                                    |
| DMDS                            | 0.02                                                  | 0.01±0.00                                                | 0.07±0.04                            | 16.5                                    |
| DMA                             | 0.02                                                  | 0.01±0.00                                                | 0.00±0.04                            | 0.0                                     |
| TMA                             | 0.16                                                  | 0.14±0.01                                                | 0.26±0.09                            | 5.8                                     |
| Formamide                       | 0.23                                                  | 0.14±0.01                                                | 0.60±0.10                            | 11.9                                    |
| Acetamide                       | 0.08                                                  | 0.05±0.00                                                | 0.20±0.06                            | 12.7                                    |
| Propanamide                     | 0.02                                                  | 0.01±0.00                                                | 0.01±0.03                            | 2.8                                     |
| Indole                          | 0.01                                                  | 0.01±0.00                                                | 0.06±0.02                            | 20.3                                    |

135

136

137 Table S7. Emissions ratios (ER) from site-integration analysis and multivariate analysis, along  
 138 with the relative fractions from feed storage+handling to different VOC species for sheep feed  
 139 yard.

| VOCs                            | Site-integrated ER<br>to NH <sub>3</sub> , ppt/ppb | ER from multivariate analysis                         |                                      | Percentage<br>fractions from<br>feed, % |
|---------------------------------|----------------------------------------------------|-------------------------------------------------------|--------------------------------------|-----------------------------------------|
|                                 |                                                    | Animal+waste relative<br>to NH <sub>3</sub> , ppt/ppb | Feed relative to<br>ethanol, ppt/ppb |                                         |
| Acetic Acid                     | 29.76                                              | 33.61±1.13                                            | 35.83±5.42                           | 3.6                                     |
| Propionic<br>Acid               | 2.43                                               | 2.44±0.10                                             | 11.63±0.48                           | 14.4                                    |
| Butyric Acid                    | 0.42                                               | 0.33±0.02                                             | 3.08±0.08                            | 24.8                                    |
| C5 Acid                         | 0.08                                               | 0.07±0.01                                             | 0.31±0.03                            | 12.8                                    |
| C6 Acid                         | 0.01                                               | 0.01±0.00                                             | 0.04±0.02                            | 17.9                                    |
| C7 Acid                         | 0.01                                               | 0.00±0.00                                             | 0.00±0.01                            | 0.0                                     |
| Ethanol                         | 58.75                                              | 17.05±0.49                                            | 1000±0.00                            | 64.2                                    |
| Methanol                        | 34.86                                              | 21.3±2.0                                              | 376±9.5                              | 38.4                                    |
| CH <sub>3</sub> CHO             | 2.63                                               | 1.24±0.11                                             | 26.29±0.54                           | 42.8                                    |
| Acetone                         | 5.46                                               | 4.00±0.13                                             | 27.82±0.64                           | 19.7                                    |
| MEK                             | 2.46                                               | 2.05±0.08                                             | 7.79±0.39                            | 11.8                                    |
| Acrolein                        | 0.22                                               | 0.13±0.02                                             | 3.80±0.08                            | 51.8                                    |
| MVK+MACR                        | 0.20                                               | 0.17±0.02                                             | 0.30±0.10                            | 5.9                                     |
| C4H6O2                          | 0.42                                               | 0.44±0.03                                             | 0.15±0.13                            | 1.2                                     |
| Phenol                          | 0.57                                               | 0.55±0.02                                             | 0.36±0.09                            | 2.2                                     |
| Cresol                          | 0.31                                               | 0.34±0.01                                             | 0.00±0.07                            | 0.0                                     |
| H <sub>2</sub> S                | 19.59                                              | 9.40±1.94                                             | 0.00±9.28                            | 0.0                                     |
| CH <sub>4</sub> S               | 0.73                                               | 0.49±0.04                                             | 0.15±0.21                            | 1.1                                     |
| C <sub>2</sub> H <sub>6</sub> S | 0.32                                               | 0.17±0.02                                             | 0.69±0.10                            | 12.9                                    |
| C <sub>3</sub> H <sub>8</sub> S | 0.01                                               | 0.01±0.00                                             | 0.00±0.01                            | 0.7                                     |
| DMDS                            | 0.02                                               | 0.01±0.00                                             | 0.02±0.02                            | 10.5                                    |
| DMA                             | 0.02                                               | 0.02±0.01                                             | 0.00±0.04                            | 0.0                                     |
| TMA                             | 0.23                                               | 0.20±0.01                                             | 0.00±0.05                            | 0.0                                     |
| Formamide                       | 0.45                                               | 0.26±0.02                                             | 0.12±0.10                            | 1.7                                     |
| Acetamide                       | 0.07                                               | 0.07±0.01                                             | 0.04±0.05                            | 1.9                                     |
| Propanamide                     | 0.03                                               | 0.03±0.01                                             | 0.03±0.03                            | 3.6                                     |
| Indole                          | 0.01                                               | 0.00±0.00                                             | 0.00±0.01                            | 0.0                                     |

140

141

142 Table S8. Emissions ratios (ER) from site-integration analysis and multivariate analysis, along  
 143 with the relative fractions from feed storage+handling to different VOC species for chicken farm.

| VOCs                            | Site-integrated<br>ER to NH <sub>3</sub> ,<br>ppt/ppb | ER from multivariate analysis                            |                                      | Percentage<br>fractions from<br>feed, % |
|---------------------------------|-------------------------------------------------------|----------------------------------------------------------|--------------------------------------|-----------------------------------------|
|                                 |                                                       | Animal+waste<br>relative to NH <sub>3</sub> ,<br>ppt/ppb | Feed relative to<br>ethanol, ppt/ppb |                                         |
| Acetic Acid                     | 12.38                                                 | 26.44±2.14                                               | 252.0±28.5                           | 22.1                                    |
| Propionic<br>Acid               | 1.36                                                  | 2.20±0.16                                                | 33.64±2.16                           | 31.3                                    |
| Butyric Acid                    | 0.34                                                  | 0.47±0.04                                                | 11.13±0.56                           | 41.3                                    |
| C5 Acid                         | 0.06                                                  | 0.09±0.01                                                | 1.80±0.14                            | 37.6                                    |
| C6 Acid                         | 0.01                                                  | 0.01±0.00                                                | 0.00±0.05                            | 0.0                                     |
| C7 Acid                         | 0.01                                                  | 0.00±0.00                                                | 0.02±0.04                            | 47.6                                    |
| Ethanol                         | 40.12                                                 | 17.05±0.49                                               | 1000±0.00                            | 81.1                                    |
| Methanol                        | 56.63                                                 | 18.6±2.29                                                | 1257±35                              | 66.8                                    |
| CH <sub>3</sub> CHO             | 7.2                                                   | 3.22±0.22                                                | 217.12±3.35                          | 66.8                                    |
| Acetone                         | 3.9                                                   | 1.86±0.17                                                | 35.52±2.57                           | 36.3                                    |
| MEK                             | 2.49                                                  | 1.14±0.12                                                | 30.91±1.83                           | 44.6                                    |
| Acrolein                        | 0.34                                                  | 0.29±0.03                                                | 17.11±0.39                           | 63.5                                    |
| MVK+MACR                        | 0.36                                                  | 0.21±0.03                                                | 9.36±0.41                            | 57.3                                    |
| C4H6O2                          | 0.68                                                  | 0.45±0.03                                                | 14.20±0.44                           | 48.2                                    |
| Phenol                          | 0.48                                                  | 0.33±0.03                                                | 8.76±0.41                            | 44.4                                    |
| Cresol                          | 0.16                                                  | 0.15±0.01                                                | 2.43±0.20                            | 32.5                                    |
| H <sub>2</sub> S                | 10.59                                                 | 6.53±0.81                                                | 233.09±12.41                         | 51.5                                    |
| CH <sub>4</sub> S               | 0.83                                                  | 0.50±0.04                                                | 17.40±0.62                           | 50.7                                    |
| C <sub>2</sub> H <sub>6</sub> S | 1.26                                                  | 0.62±0.08                                                | 22.88±1.24                           | 52.2                                    |
| C <sub>3</sub> H <sub>8</sub> S | 0.01                                                  | 0.00±0.00                                                | 0.00±0.05                            | 0.0                                     |
| DMDS                            | 0.06                                                  | 0.02±0.01                                                | 0.25±0.11                            | 24.3                                    |
| DMA                             | 0.01                                                  | 0.01±0.01                                                | 0.04±0.11                            | 13.5                                    |
| TMA                             | 0.03                                                  | 0.03±0.00                                                | 0.00±0.07                            | 0.0                                     |
| Formamide                       | 0.5                                                   | 0.27±0.02                                                | 0.18±0.38                            | 1.9                                     |
| Acetamide                       | 0.12                                                  | 0.06±0.01                                                | 0.25±0.19                            | 11.4                                    |
| Propanamide                     | 0.02                                                  | 0.01±0.01                                                | 0.23±0.09                            | 32.3                                    |
| Indole                          | 0.01                                                  | 0.01±0.00                                                | 0.08±0.02                            | 26.6                                    |

144

145
